# Supplementary material
Source: PubMed Central journal article supplement (PMC1253546)

**A**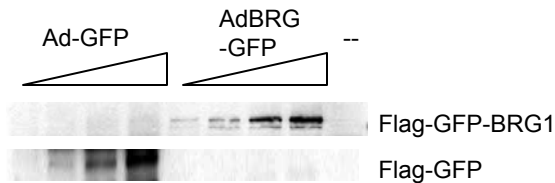**B**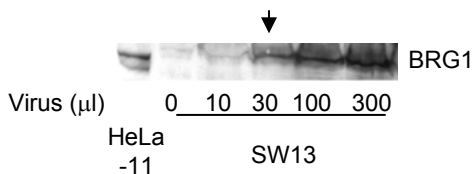**C**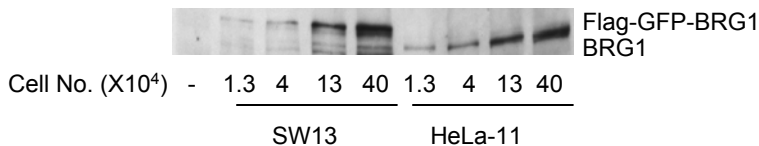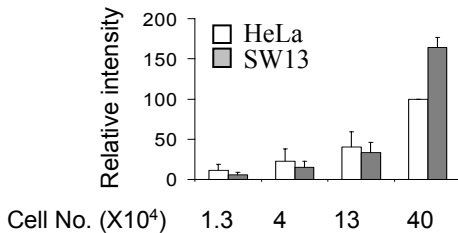

Supplement: pnas_0503070102_1.pdf [file pnas_0503070102_1.pdf]

GFP  
BRG1

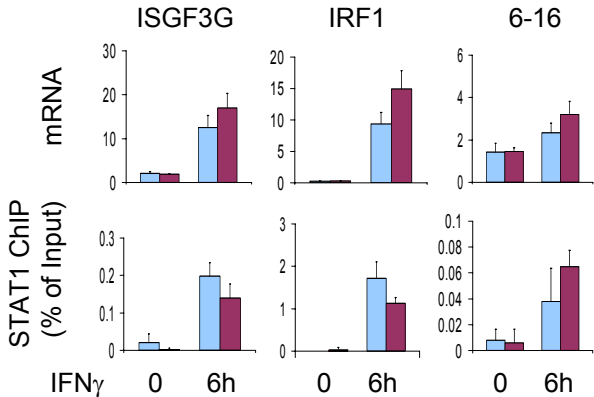

Supplement: pnas_0503070102_2.pdf [file pnas_0503070102_2.pdf]

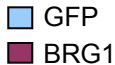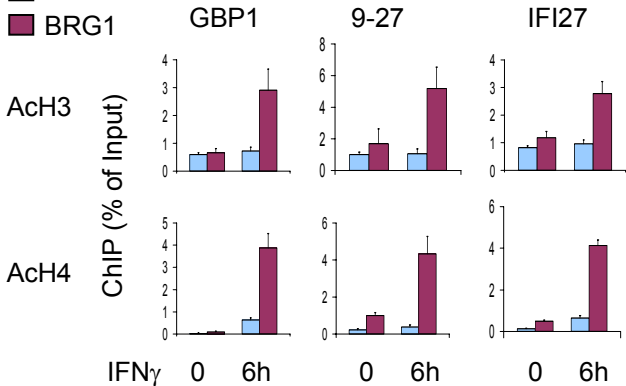

Supplement: pnas_0503070102_3.pdf [file pnas_0503070102_3.pdf]

GFP  
BRG1

ChIP (% of input)

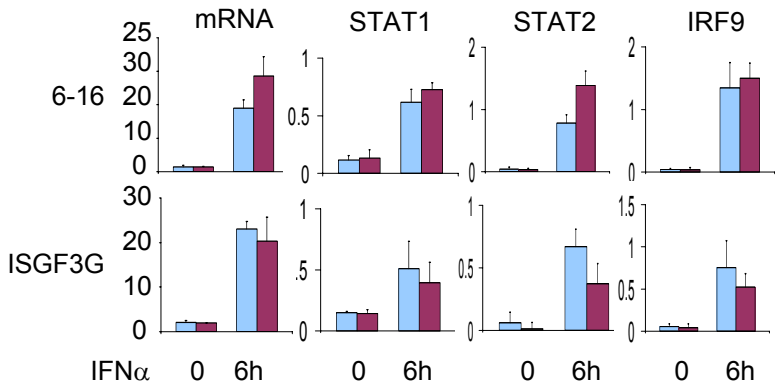

Supplement: pnas_0503070102_4.pdf [file pnas_0503070102_4.pdf]

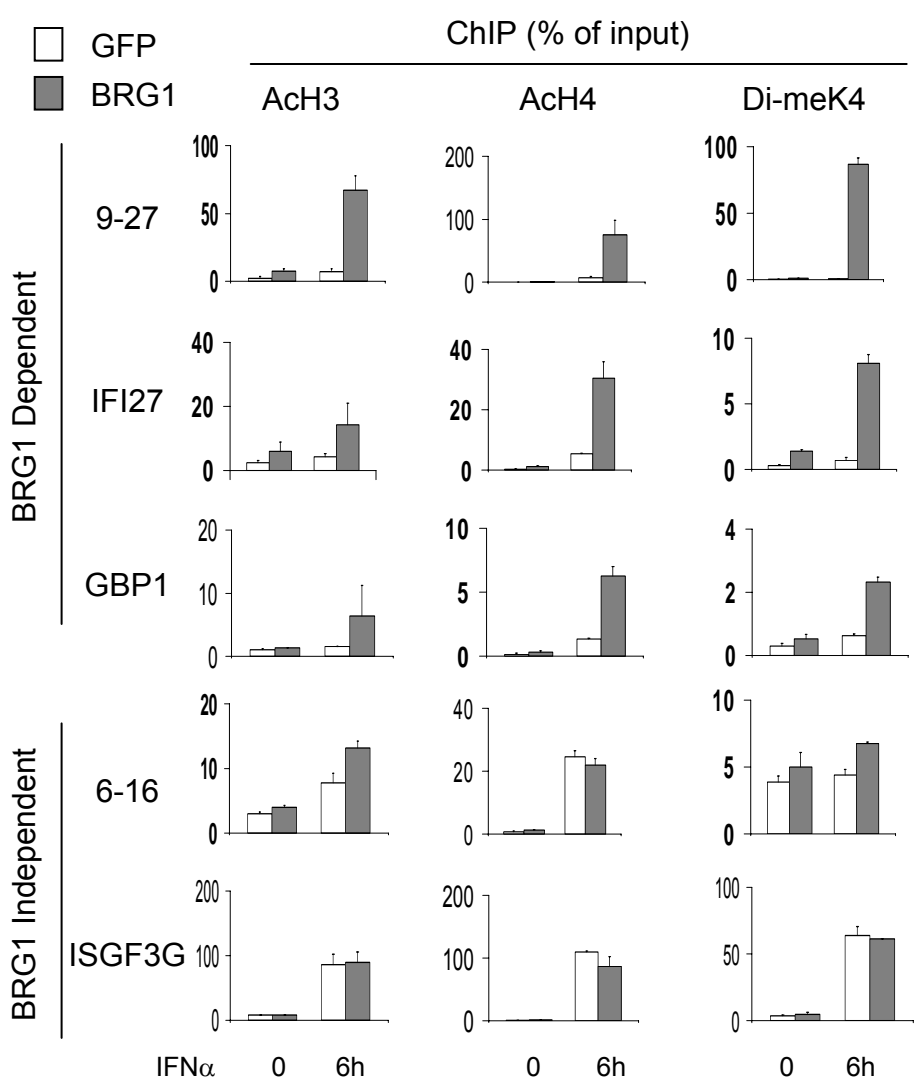

Supplement: pnas_0503070102_5.pdf [file pnas_0503070102_5.pdf]

**A**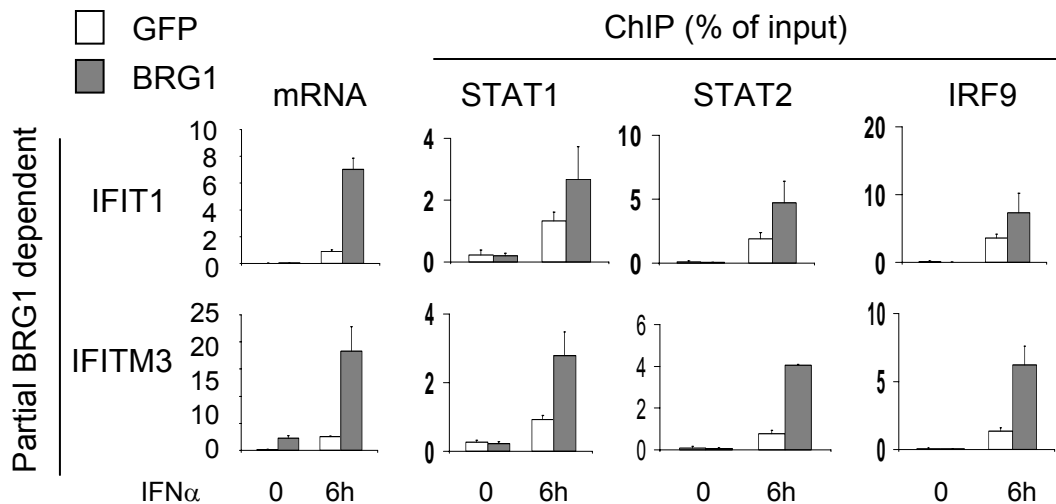**B**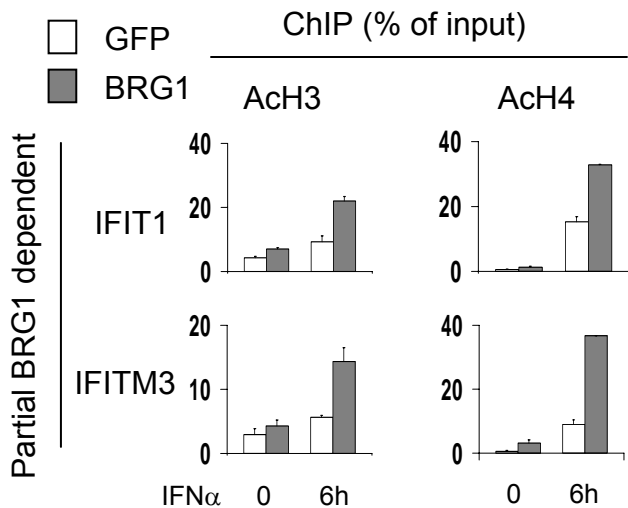

Supplement: pnas_0503070102_6.pdf [file pnas_0503070102_6.pdf]
